# Supplementary material
Source: publisher figshare collection journal article supplement (https://wiley.figshare.com/ndownloader/files/18944669)
Supplement: Supplementary file 1 [file 18944669]

- Codes:
- There are 6 R codes and 1 MATLAB code in the Supporting Information, which are used in the paper of MA and MCDERMOTT: Generalized Multiple Contrast Tests in Dose-Response Studies.
- The MATLAB version is R2018a. R studio version is 3.5.0.
- Linux server and Linux cluster are used for simulation studies. All simulation studies were conducted under either Nemo or BlueHive using R package ‘mvtnorm’ version 1.0-8, where Nemo is a Red Hat Linux server in the Department of Biostatistics and Computational Biology at University of Rochester Medical Center and BlueHive system is a Linux cluster provided by the Center for Integrated Research Computing (CIRC) at the University of Rochester.
- Please note that different version of softwares, packages, Linux and/or windows systems, and different seed would generate different simulation results (within the simulation error).
- Inverse normal numerical integration.csv file:
  - This is a csv generated using the MATLAB code 'MATLAB code Inverse normal numerical integration. m', and is used to calculate the polynomial approximation of the covariance terms.
